# Supplementary material for: Development of a green and sustainable rice husk nanosilica-based spectrophotometric probe for dual detection of Ag(i) and Fe(iii) in environmental and E-waste matrices
Source: Royal Society of Chemistry journal article supplement (doi:10.1039/d6ra02312f), 2026-05-26
Supplement: d6ra02312f1.pdf [file d6ra02312f1.pdf]

**Development of green and sustainable Rice Husk nanosilica-based spectrophotometric probe for  
Dual Detection of Ag(I) and Fe(III) in environmental and E-waste matrices**

Ahmed A. Alluhyabi<sup>1</sup>, Azza Attia<sup>2</sup>, Musa A. Said<sup>3\*</sup>, Thamer S. Alraddadi<sup>3</sup>, Biprajit Sarkar<sup>4</sup>, Reda F. M. Elshaarawy<sup>5\*</sup>, Ahmed Shahat<sup>3</sup>, M.A. Shenashen<sup>6</sup>

<sup>1</sup> Department of Chemistry, College of Science and Arts, King Abdulaziz University, Rabigh, Saudi Arabia, [aamallehabi@kau.edu.sa](mailto:aamallehabi@kau.edu.sa)

<sup>2</sup> Department of Chemistry, Faculty of Science and Arts, Najran University, Najran, Saudi Arabia, [azzaattia81@yahoo.com](mailto:azzaattia81@yahoo.com)

<sup>3</sup> Chemistry Department, Faculty of Science, Islamic University of Madinah, Madinah, 42351, Saudi Arabia, [mssaeed@iu.edu.sa](mailto:mssaeed@iu.edu.sa), [talraddadi@iu.edu.sa](mailto:talraddadi@iu.edu.sa), [ashahat@aucegypt.edu](mailto:ashahat@aucegypt.edu)

<sup>4</sup> Institut für Chemie und Biochemie, Anorganische Chemie, Fabeckstraße 34-36, Freie, Universität Berlin, 14195 Berlin, Germany, [b.sarkar@fu-berlin.de](mailto:b.sarkar@fu-berlin.de)

<sup>5</sup> Department of Chemistry, Faculty of Science, Suez University, 43533 Suez, Egypt, [reda.elshaarawy@suezuniv.edu.eg](mailto:reda.elshaarawy@suezuniv.edu.eg)

<sup>6</sup> Department of Petrochemical, Egyptian Petroleum Research Institute (EPRI), Nasr City, Cairo 11727, Egypt, [mashenashen@gmail.com](mailto:mashenashen@gmail.com)

\*Corresponding authors. Tel:00201002535379 E-mail: [reda.elshaarawy@suezuniv.edu.eg](mailto:reda.elshaarawy@suezuniv.edu.eg) (RFME) and [mssaeed@iu.edu.sa](mailto:mssaeed@iu.edu.sa) (MAS)

## 1 Instrumentation and Characterization

The surface morphology and internal nanostructure of RHNS and Br-Naphthophen@RHNS were characterized by High-Resolution Scanning Electron Microscopy (HR-SEM) on a JEOL JSM-7900F system (accelerating voltage: 15 kV) and Transmission Electron Microscopy (TEM) on a JEOL JEM-2100 microscope operating at 200 kv. Crystallographic phase analysis and verification of the amorphous silica framework were performed by X-ray Diffraction (XRD) on a Bruker D8 Advance diffractometer with Cu K $\alpha$  radiation ( $\lambda = 1.5406 \text{ \AA}$ ). Patterns were recorded over  $2\theta = 5\text{--}70^\circ$  with a scanning step of  $2^\circ \text{ min}^{-1}$ . Fourier-transform infrared (FTIR) spectra were recorded on a Bruker Alpha II spectrometer with an ATR unit, in the  $400\text{--}4000 \text{ cm}^{-1}$  range. Textural properties, including specific surface area and pore size distribution, were determined from N<sub>2</sub> adsorption–desorption isotherms at 77 K using a Micromeritics ASAP 2020 analyzer, following sample activation at 120 °C for 6 h under vacuum. Spectroscopic monitoring of the sensing mechanism was performed using a Shimadzu UV-2600 UV–vis spectrophotometer for absorbance measurements and stoichiometric analysis. The concentrations of metal ions were measured using a Seiko SPS-1500 inductively coupled plasma optical emission spectrometer (ICP-OES) produced by Seiko Instruments, located in Chiba, Japan. Theoretical insights into the electronic structure and binding energies were obtained via Density Functional Theory (DFT) calculations using the Gaussian 09 software suite, employing the B3LYP functional with the 6-31+G(d,p) basis set for light atoms and the LanL2DZ pseudopotential for metal centers.

**Table S1:** Tolerance concentration for interfering ions species by detection of [0.5 ppm] Ag<sup>+</sup> and Fe<sup>3+</sup> ions using

| Analyte          | pH  | Tolerance limit for foreign ions (ppm) |                  |                  |                  |                  |                  |                  |                  |                  |                  |                  |                  |                  |                  |                  |                  |
|------------------|-----|----------------------------------------|------------------|------------------|------------------|------------------|------------------|------------------|------------------|------------------|------------------|------------------|------------------|------------------|------------------|------------------|------------------|
|                  |     | Ag <sup>+</sup>                        | Fe <sup>3+</sup> | Au <sup>3+</sup> | Ca <sup>2+</sup> | Cd <sup>2+</sup> | Ce <sup>3+</sup> | Co <sup>2+</sup> | Cr <sup>3+</sup> | Mg <sup>2+</sup> | Hg <sup>2+</sup> | Cu <sup>2+</sup> | Mn <sup>2+</sup> | Ni <sup>2+</sup> | Pb <sup>2+</sup> | Pd <sup>2+</sup> | Zn <sup>2+</sup> |
| Ag <sup>+</sup>  | 6.2 | Ref.                                   | -                | 100              | 100              | 100              | 125              | 100              | 100              | 100              | 125              | 50               | 100              | 100              | 100              | 100              | 100              |
| Fe <sup>3+</sup> | 3.6 | -                                      | Ref.             | 100              | 100              | 100              | 125              | 100              | 100              | 100              | 125              | 50               | 100              | 100              | 100              | 100              | 100              |

BNP@RHNS.

**Table S2:** Comprehensive tolerance limits and molar ratios for interfering ions

| Interfering Ion  | Tolerance Limit (ppm) | Molar Ratio (vs.0.5 ppm Ag <sup>+</sup> ) | Molar Ratio (vs.0.5 ppm Fe <sup>3+</sup> ) |
|------------------|-----------------------|-------------------------------------------|--------------------------------------------|
| Au <sup>3+</sup> | 100                   | 110                                       | 57                                         |
| Ca <sup>2+</sup> | 100                   | 539                                       | 278                                        |
| Cd <sup>2+</sup> | 100                   | 192                                       | 99                                         |
| Ce <sup>3+</sup> | 125                   | 193                                       | 100                                        |
| Co <sup>2+</sup> | 100                   | 366                                       | 189                                        |
| Cr <sup>3+</sup> | 100                   | 415                                       | 214                                        |
| Mg <sup>2+</sup> | 100                   | 888                                       | 459                                        |
| Hg <sup>2+</sup> | 125                   | 135                                       | 70                                         |
| Cu <sup>2+</sup> | 50                    | 170                                       | 88                                         |
| Mn <sup>2+</sup> | 100                   | 393                                       | 203                                        |
| Ni <sup>2+</sup> | 100                   | 368                                       | 190                                        |
| Pb <sup>2+</sup> | 100                   | 104                                       | 54                                         |
| Pd <sup>2+</sup> | 100                   | 203                                       | 105                                        |
| Zn <sup>2+</sup> | 100                   | 330                                       | 170                                        |

## 2 Ligand Leaching Control Experiment

To evaluate the hydrolytic stability of the immobilized BNP ligand under the optimized acidic conditions required for Fe<sup>3+</sup> detection, a leaching study was conducted. Approximately 20 mg of the BNP ligand sensor was suspended in 20 mL of a universal buffer adjusted to pH 3.6. The suspension was vortexed for 40 seconds, matching the maximum optimized response time of the analytical assay. Subsequently, the mixture was centrifuged at 8000 rpm for 15 minutes to isolate the solid phase. The resulting supernatant was analyzed via UV-Vis spectrophotometry within the spectral range of 200–600 nm to detect and quantify any released organic chromophores, using the free ligand calibration curve as a reference. Statistical analysis of three independent replicates (n=3) yielded a leaching percentage of  $0.74 \pm 0.03\%$ . This negligible release confirms that the organic chromophore remains robustly associated with the silica framework during the analytical timeframe.

## 3 Hydrolytic Stability and Leaching Analysis of BNP@RHNS Sensor

To ensure the reliability of the spectrophotometric response, particularly at the acidic conditions required for Fe<sup>3+</sup> detection (pH 3.6), the hydrolytic stability of the azomethine (-C=N-) linkage was rigorously evaluated. Although Schiff bases are potentially susceptible to acid-catalyzed hydrolysis, the BNP@RHNS sensor demonstrated remarkable structural integrity during the analytical timeframe. A leaching control experiment was conducted by incubating 20 mg of the sensor in a universal buffer at pH 3.6 for the maximum optimized response time of 40 seconds. Following centrifugation at 8000 rpm, UV-Vis analysis of the supernatant revealed a negligible absorbance signal, confirming that less than 0.9% of the immobilized ligand was released into the aqueous phase. This high stability is attributed to the pore-filling mechanism and the protective microenvironment provided by the mesoporous RHNS channels, which shield the anchored BNP

molecules from direct hydrolytic attack. Furthermore, the rapid detection kinetics ( $< 40$  seconds) effectively bypass the slower timeframe typical of imine degradation. The sensor's robustness is further corroborated by its successful regeneration and high performance over six consecutive cycles using  $0.1 \text{ M HCl}$ , demonstrating that the observed spectrophotometric signal at  $\text{pH } 3.6$  arises from genuine  $\text{Fe}^{3+}$  coordination within the  $\text{N}_2\text{O}_2$  cavity rather than ligand decomposition products.

#### **4 Thermal Stability Control**

To differentiate between the analytical signal and potential thermal degradation of the organic framework, a control experiment was performed on the  $\text{BNP@RHNS}$  sensor without metal ions across the temperature range of  $20\text{--}50 \text{ }^\circ\text{C}$ . The sensor was suspended in water and equilibrated at each temperature for 10 minutes, significantly longer than the standard analytical response time. Following centrifugation, UV-Vis spectra of the supernatants were recorded. The results showed a flat baseline with no characteristic absorbance peaks associated with the BNP ligand or its components, indicating that the leaching percentage remained beneath the detection threshold even at  $50 \text{ }^\circ\text{C}$ . This confirms that the observed enhancement in the spectrophotometric signal with increasing temperature is a direct consequence of the endothermic nature of the  $\text{Ag}^+$  and  $\text{Fe}^{3+}$  complexation process on the  $\text{BNP@RHNS}$  surface.

Table S3. Quantitative Reusability Data for BNP@RHNS Sensor (n=3)

| Cycle Number | Ag <sup>+</sup> Signal Response (%) (Mean ± SD) | Fe <sup>3+</sup> Signal Response (%) (Mean ± SD) |
|--------------|-------------------------------------------------|--------------------------------------------------|
| Cycle 1      | 98.10 ± 1.20                                    | 96.40 ± 1.40                                     |
| Cycle 2      | 97.60 ± 1.50                                    | 95.10 ± 1.60                                     |
| Cycle 3      | 95.80 ± 1.80                                    | 92.30 ± 1.90                                     |
| Cycle 4      | 92.20 ± 2.1                                     | 90.80 ± 2.20                                     |
| Cycle 5      | 89.50 ± 2.4                                     | 87.70 ± 2.50                                     |
| Cycle 6      | 87.10 ± 2.7                                     | 84.20 ± 2.90                                     |

## 5 DFT Computational Analysis

Density functional theory (DFT) calculations were performed to elucidate the electronic structure of the free ligand (BNP), the [BNP–Ag]<sup>+</sup> complex, and the [BNP–Fe]<sup>3+</sup> complex. The free BNP ligand was fully geometry-optimized at the B3LYP/6-31G(d,p) level of theory, converging after 31 optimization cycles to a stationary point confirmed by the absence of imaginary frequencies (total electronic energy:  $E = -3910.12096507$  Hartree; ZPE correction: 0.3978 Hartree; Table S5). Single-point energy calculations with time-dependent DFT (TD-DFT, six lowest excited states) were subsequently carried out for both metal complexes at the UB3LYP/LANL2DZ level using experimentally informed input geometries. Full Cartesian coordinates for all three species are compiled in Table S4; selected geometric parameters are presented in Table S6; total energies are summarized in Table S5. The free BNP ligand exhibits a HOMO–LUMO gap of 3.36 eV (HOMO = –5.36 eV; LUMO = –1.99 eV), consistent with a moderate-gap conjugated Schiff base framework possessing  $\pi$ -donor and  $\pi^*$ -acceptor character. Formation of the [BNP–Ag]<sup>+</sup> complex perturbs the electronic manifold into two distinct spin channels arising from the open-shell doublet ground state ( $S = 1/2$ ;  $\langle S^2 \rangle = 0.761$  before annihilation, 0.750 after). The  $\alpha$ -channel HOMO–LUMO gap widens to 3.91 eV relative to the free ligand, reflecting the stabilization of metal d-type occupied orbitals upon N,N-bidentate coordination. Crucially, the  $\beta$ -channel gap narrows markedly to 1.08 eV, with the singly occupied  $\beta$ -LUMO at –4.49 eV constituting a low-lying ligand-to-metal charge-transfer (LMCT) acceptor manifold that underpins the selective chromogenic response toward Ag<sup>+</sup> (Table S5). The [BNP–Fe] complex presents a substantially compressed HOMO–LUMO gap of 1.34 eV (HOMO = –5.28 eV; LUMO = –3.94 eV), consistent with the highly polarizable electronic environment induced by Fe<sup>2+</sup> and

with the observed quench-type optical response. Complete frontier orbital energy data are collected in Table S6.

**Table S4;** Optimized Cartesian coordinates for the (a) free BNP ligand, (b) [BNP–Ag]<sup>+</sup> Complex, and (c) [BNP–Fe]<sup>+3</sup> Complex.

(a) Free BNP Ligand

| No. | Elem. | X (Å)     | Y (Å)     | Z (Å)     |
|-----|-------|-----------|-----------|-----------|
| 1   | C     | 1.335179  | 3.739574  | 0.221397  |
| 2   | C     | 1.760251  | 2.423028  | 0.359635  |
| 3   | C     | 0.818548  | 1.386500  | 0.466380  |
| 4   | C     | -0.568207 | 1.700471  | 0.428822  |
| 5   | C     | -0.957393 | 3.042198  | 0.299977  |
| 6   | C     | -0.018713 | 4.066018  | 0.193953  |
| 7   | Br    | 2.640006  | 5.134544  | 0.098234  |
| 8   | N     | 1.181968  | 0.058755  | 0.675256  |
| 9   | C     | 2.140737  | -0.474136 | 0.008761  |
| 10  | C     | 2.592313  | -1.856749 | 0.169494  |
| 11  | C     | 3.856045  | -2.272250 | -0.393730 |
| 12  | C     | 4.229097  | -3.656701 | -0.362147 |
| 13  | C     | 3.351716  | -4.592252 | 0.245491  |
| 14  | C     | 2.170472  | -4.188721 | 0.809636  |
| 15  | C     | 1.783940  | -2.824405 | 0.785576  |
| 16  | C     | 4.785770  | -1.364906 | -0.975021 |
| 17  | C     | 5.978001  | -1.800859 | -1.513290 |
| 18  | C     | 6.325100  | -3.169460 | -1.497158 |
| 19  | C     | 5.462893  | -4.075003 | -0.923950 |
| 20  | O     | 0.612996  | -2.447748 | 1.339449  |
| 21  | O     | -2.073012 | -1.650129 | 1.553512  |
| 22  | C     | -7.123002 | -1.383380 | -0.807738 |
| 23  | C     | -7.519088 | -0.323201 | -1.592399 |
| 24  | C     | -6.624166 | 0.745159  | -1.808069 |
| 25  | C     | -5.363633 | 0.739187  | -1.245464 |
| 26  | C     | -3.263712 | -1.511723 | 0.967648  |
| 27  | C     | -4.193737 | -2.567309 | 1.167297  |
| 28  | C     | -5.433522 | -2.517256 | 0.592977  |
| 29  | C     | -5.834742 | -1.417692 | -0.218781 |
| 30  | C     | -4.917676 | -0.338420 | -0.434390 |
| 31  | C     | -3.607194 | -0.392574 | 0.176829  |
| 32  | C     | -2.637473 | 0.664000  | -0.015180 |
| 33  | N     | -1.476976 | 0.645107  | 0.562176  |
| 34  | H     | 2.817386  | 2.194040  | 0.423136  |
| 35  | H     | -2.012846 | 3.294349  | 0.324252  |
| 36  | H     | -0.333377 | 5.099899  | 0.116272  |
| 37  | H     | 2.647215  | 0.100612  | -0.777259 |
| 38  | H     | 3.634615  | -5.641156 | 0.266170  |
| 39  | H     | 1.509791  | -4.910011 | 1.285118  |
| 40  | H     | 4.575798  | -0.302230 | -0.982065 |
| 41  | H     | 6.662790  | -1.077785 | -1.946763 |
| 42  | H     | 7.267672  | -3.497973 | -1.923709 |
| 43  | H     | 5.715591  | -5.131539 | -0.886931 |
| 44  | H     | 0.072764  | -3.215829 | 1.569389  |
| 45  | H     | -1.511790 | -0.844432 | 1.323054  |
| 46  | H     | -7.796653 | -2.216888 | -0.625612 |

|    |   |           |           |           |
|----|---|-----------|-----------|-----------|
| 47 | H | -8.507975 | -0.306008 | -2.039726 |
| 48 | H | -6.928886 | 1.586526  | -2.423794 |
| 49 | H | -4.713607 | 1.585037  | -1.436483 |
| 50 | H | -3.882205 | -3.401379 | 1.787015  |
| 51 | H | -6.138976 | -3.328783 | 0.751785  |
| 52 | H | -2.899146 | 1.485654  | -0.687104 |

(b) [BNP–Ag]<sup>+</sup> Complex

| No. | Elem. | X (Å)     | Y (Å)     | Z (Å)     |
|-----|-------|-----------|-----------|-----------|
| 1   | C     | 0.122846  | 4.091400  | 0.168875  |
| 2   | C     | 0.089523  | 3.071615  | -0.693945 |
| 3   | C     | 0.037183  | 1.723579  | -0.165481 |
| 4   | C     | 0.047856  | 1.492022  | 1.132122  |
| 5   | C     | 0.070440  | 2.575047  | 2.094145  |
| 6   | C     | 0.107800  | 3.830160  | 1.637171  |
| 7   | Br    | 0.191260  | 5.877896  | -0.475644 |
| 8   | N     | 0.052983  | 0.532961  | -0.900324 |
| 9   | C     | 1.518176  | 0.207284  | -1.209770 |
| 10  | C     | 2.199147  | -1.194751 | -0.199201 |
| 11  | C     | 3.533499  | -1.384630 | -0.248799 |
| 12  | C     | 4.178916  | -2.498350 | 0.500866  |
| 13  | C     | 3.512551  | -3.374362 | 1.258424  |
| 14  | C     | 2.073961  | -3.327081 | 1.423803  |
| 15  | C     | 1.365546  | -2.393383 | 0.818251  |
| 16  | C     | 4.432417  | -0.510788 | -1.055014 |
| 17  | C     | 5.745738  | -0.736722 | -1.085528 |
| 18  | C     | 6.355697  | -1.840798 | -0.335625 |
| 19  | C     | 5.619517  | -2.663057 | 0.407005  |
| 20  | O     | -0.081877 | -2.376665 | 0.991574  |
| 21  | O     | -0.047753 | -1.959287 | -1.367572 |
| 22  | C     | -5.760260 | -2.130083 | -0.866147 |
| 23  | C     | -6.459622 | -1.574314 | 0.119495  |
| 24  | C     | -5.800215 | -0.826848 | 1.196421  |
| 25  | C     | -4.476590 | -0.672955 | 1.233605  |
| 26  | C     | -1.494842 | -1.958131 | -1.197746 |
| 27  | C     | -2.244989 | -2.589882 | -2.079946 |
| 28  | C     | -3.685333 | -2.615879 | -1.928122 |
| 29  | C     | -4.312404 | -2.018442 | -0.910679 |
| 30  | C     | -3.616775 | -1.263823 | 0.169225  |
| 31  | C     | -2.273862 | -1.138670 | 0.175866  |
| 32  | C     | -1.529779 | -0.205577 | 1.599649  |
| 33  | N     | -0.044189 | 0.124592  | 1.411062  |
| 34  | Ag    | -0.029939 | -0.908404 | 0.035876  |
| 35  | H     | 0.103088  | 3.244652  | -1.739860 |
| 36  | H     | 0.056450  | 2.376492  | 3.135604  |
| 37  | H     | 0.126225  | 4.642151  | 2.319574  |
| 38  | H     | 1.596620  | -0.088359 | -2.264154 |
| 39  | H     | 2.156538  | 1.094365  | -1.092200 |
| 40  | H     | 4.057766  | -4.137210 | 1.753045  |
| 41  | H     | 1.587543  | -4.048017 | 2.030229  |
| 42  | H     | 4.055368  | 0.295243  | -1.613198 |
| 43  | H     | 6.365694  | -0.102754 | -1.666723 |
| 44  | H     | 7.404611  | -1.987094 | -0.387205 |
| 45  | H     | 6.089518  | -3.452905 | 0.935958  |
| 46  | H     | -6.265717 | -2.665605 | -1.629285 |
| 47  | H     | -7.515260 | -1.674559 | 0.127253  |
| 48  | H     | -6.391790 | -0.398405 | 1.964899  |

|    |          |           |           |           |
|----|----------|-----------|-----------|-----------|
| 49 | <b>H</b> | -4.063347 | -0.127409 | 2.030517  |
| 50 | <b>H</b> | -1.790925 | -3.084173 | -2.900776 |
| 51 | <b>H</b> | -4.264787 | -3.133882 | -2.649126 |
| 52 | <b>H</b> | -2.117179 | 0.702757  | 1.795424  |
| 53 | <b>H</b> | -1.638714 | -0.837443 | 2.490702  |

(c) [BNP-Fe]<sup>+3</sup> Complex

| No. | Elem.     | X (Å)     | Y (Å)     | Z (Å)     |
|-----|-----------|-----------|-----------|-----------|
| 1   | <b>C</b>  | -0.753442 | 3.396002  | -0.198706 |
| 2   | <b>C</b>  | -1.115861 | 2.310365  | 0.493894  |
| 3   | <b>C</b>  | -0.473396 | 1.052311  | 0.209672  |
| 4   | <b>C</b>  | 0.551958  | 0.982210  | -0.857769 |
| 5   | <b>C</b>  | 0.918022  | 2.181710  | -1.568090 |
| 6   | <b>C</b>  | 0.304207  | 3.330552  | -1.262913 |
| 7   | <b>Br</b> | -1.592557 | 5.059032  | 0.176021  |
| 8   | <b>N</b>  | -0.787607 | -0.382478 | 1.006627  |
| 9   | <b>C</b>  | -2.148234 | -0.763974 | 1.307144  |
| 10  | <b>C</b>  | -2.929270 | -1.392852 | 0.182180  |
| 11  | <b>C</b>  | -4.140975 | -1.936140 | 0.405889  |
| 12  | <b>C</b>  | -4.884998 | -2.519132 | -0.699929 |
| 13  | <b>C</b>  | -4.386242 | -2.511152 | -1.929316 |
| 14  | <b>C</b>  | -3.085839 | -1.921086 | -2.175462 |
| 15  | <b>C</b>  | -2.388027 | -1.395107 | -1.172990 |
| 16  | <b>C</b>  | -4.775788 | -1.967411 | 1.748904  |
| 17  | <b>C</b>  | -5.977368 | -2.523256 | 1.907829  |
| 18  | <b>C</b>  | -6.705012 | -3.115733 | 0.772120  |
| 19  | <b>C</b>  | -6.187267 | -3.111521 | -0.454917 |
| 20  | <b>O</b>  | -1.179518 | -0.868812 | -1.445610 |
| 21  | <b>O</b>  | 1.592884  | -0.085511 | 1.312450  |
| 22  | <b>C</b>  | 6.960389  | -1.551232 | 0.967472  |
| 23  | <b>C</b>  | 7.513476  | -1.852675 | -0.205969 |
| 24  | <b>C</b>  | 6.730118  | -1.801623 | -1.452587 |
| 25  | <b>C</b>  | 5.441646  | -1.458199 | -1.449640 |
| 26  | <b>C</b>  | 2.886713  | -0.434269 | 1.193862  |
| 27  | <b>C</b>  | 3.633660  | -0.469063 | 2.293614  |
| 28  | <b>C</b>  | 5.028647  | -0.854077 | 2.216530  |
| 29  | <b>C</b>  | 5.563373  | -1.164513 | 1.042655  |
| 30  | <b>C</b>  | 4.764195  | -1.117174 | -0.172273 |
| 31  | <b>C</b>  | 3.465613  | -0.766911 | -0.103447 |
| 32  | <b>C</b>  | 2.620117  | -0.686489 | -1.349335 |
| 33  | <b>N</b>  | 1.197533  | -0.534066 | -1.145297 |
| 34  | <b>Fe</b> | 0.206699  | -0.473764 | -0.066721 |
| 35  | <b>H</b>  | -1.861648 | 2.375737  | 1.245008  |
| 36  | <b>H</b>  | 1.659446  | 2.152635  | -2.325629 |
| 37  | <b>H</b>  | 0.568415  | 4.214251  | -1.786191 |
| 38  | <b>H</b>  | -2.162230 | -1.444830 | 2.168956  |
| 39  | <b>H</b>  | -2.702933 | 0.128836  | 1.628992  |
| 40  | <b>H</b>  | -4.937375 | -2.937310 | -2.728317 |
| 41  | <b>H</b>  | -2.684688 | -1.916712 | -3.156792 |
| 42  | <b>H</b>  | -4.290915 | -1.554711 | 2.593204  |
| 43  | <b>H</b>  | -6.418072 | -2.539134 | 2.872052  |
| 44  | <b>H</b>  | -7.657691 | -3.551974 | 0.934163  |
| 45  | <b>H</b>  | -6.728855 | -3.542284 | -1.257977 |
| 46  | <b>H</b>  | 7.543185  | -1.592984 | 1.852046  |

|    |          |          |           |           |
|----|----------|----------|-----------|-----------|
| 47 | <b>H</b> | 8.535348 | -2.132763 | -0.243833 |
| 48 | <b>H</b> | 7.200447 | -2.043345 | -2.371650 |
| 49 | <b>H</b> | 4.919517 | -1.435700 | -2.368821 |
| 50 | <b>H</b> | 3.203847 | -0.224356 | 3.231286  |
| 51 | <b>H</b> | 5.620277 | -0.890183 | 3.095406  |
| 52 | <b>H</b> | 2.984566 | 0.170772  | -1.932778 |
| 53 | <b>H</b> | 2.815768 | -1.571166 | -1.969678 |

**Table S5:** Total electronic energies (Hartree) and zero-point energy (ZPE) corrections for all computed structures.

| Species                        | $E_{\text{el}}$ (Hartree) | ZPE (Hartree)    | $E + \text{ZPE}$ (Hartree) |
|--------------------------------|---------------------------|------------------|----------------------------|
| Free Ligand (BNP)              | -3910.12096507            | 0.397764         | -3909.72320107             |
| [BNP–Ag] <sup>+</sup> Complex  | -1496.27776109            | N/A <sup>a</sup> | —                          |
| [BNP–Fe] <sup>+3</sup> Complex | -1474.20641363            | N/A <sup>a</sup> | —                          |

<sup>a</sup> ZPE unavailable for metal complexes

**Table S6:** Selected bond lengths (Å), bond angles (°), and HOMO–LUMO gaps (eV) at key structural and coordination sites

| Parameter                                        | Free Ligand | [BNP–Ag] <sup>+</sup>                    | [BNP–Fe] <sup>+3</sup> |
|--------------------------------------------------|-------------|------------------------------------------|------------------------|
| <b>Bond Lengths (Å)</b>                          |             |                                          |                        |
| C=N (imine, C9–N1)                               | 1.2835      | 1.5325                                   | 1.4447                 |
| C–O (phenolate, C15–O1)                          | 1.3490      | 1.4579                                   | 1.3460                 |
| N1…N2 (bite distance)                            | 2.7252      | 2.3492                                   | 2.4318                 |
| M–N1 (imine N)                                   | —           | 2.1–2.3                                  | 2.0–2.2                |
| M–N2 (amine N)                                   | —           | 2.1–2.3                                  | 2.0–2.2                |
| M–O1 (phenolate O)                               | —           | —                                        | 1.9947                 |
| M–O2                                             | —           | —                                        | 1.9936                 |
| <b>Bond Angles (°)</b>                           |             |                                          |                        |
| N1–M–N2                                          | —           | 86.12                                    | 178.76                 |
| N1–M–O1                                          | —           | —                                        | 92.70                  |
| N2–M–O2                                          | —           | —                                        | 92.70                  |
| O1–M–O2                                          | —           | —                                        | 179.81                 |
| <b>HOMO–LUMO Gap (<math>\Delta E</math>, eV)</b> |             |                                          |                        |
| $\Delta E$ (HOMO–LUMO)                           | 3.3644      | 3.9119 ( $\alpha$ ) / 1.0770 ( $\beta$ ) | 1.3445                 |
| HOMO (eV)                                        | -5.3577     | -5.6447 ( $\alpha$ )                     | -5.2834                |
| LUMO (eV)                                        | -1.9932     | -1.7328 ( $\alpha$ )                     | -3.9389                |

**Table S7:** Total electronic energies for [BNP–Ag]<sup>+</sup> and [BNP–Fe]<sup>3+</sup>.

| <b>Complex</b>        | <b>E(complex) (Ha)</b> | <b>Level</b>   |
|-----------------------|------------------------|----------------|
| [BNP–Ag] <sup>+</sup> | -1496.27776109         | UB3LYP/LANL2DZ |
| [BNP–Fe]              | -1474.20641363         | UB3LYP/LANL2DZ |
